# Supplementary material for: In situ fabricated photo-electro-catalytic hybrid cathode for light-assisted lithium–CO2 batteries
Source: Royal Society of Chemistry journal article supplement (doi:10.1039/d0ta05069e), 2020-01-01
Supplement: d0ta05069e1.pdf [file d0ta05069e1.pdf]

Supporting Information

## **In-Situ Fabricated Photo-Electro-Catalytic Hybrid Cathode for Light-Assisted Lithium-CO<sub>2</sub> batteries**

Zhe Li,<sup>‡a</sup> Ma-Lin Li,<sup>‡bc</sup> Xiao-Xue Wang,<sup>b</sup> De-Hui Guan,<sup>b</sup> Wan-Qiang Liu<sup>\*a</sup> and Ji-Jing Xu<sup>\*bc</sup>

<sup>a</sup> School of Materials Science and Engineering, Changchun University of Science and Technology, Changchun 130022, China.

<sup>b</sup> State Key Laboratory of Inorganic Synthesis and Preparative Chemistry, College of Chemistry, Jilin University, Changchun 130012, P.R. China.

<sup>c</sup> International Center of Future Science, Jilin University, Changchun 130012, P. R. China.

<sup>‡</sup> These authors contributed equally to this work

\* Correspondence author: [wqliu1979@126.com](mailto:wqliu1979@126.com); [jijingxu@jlu.edu.cn](mailto:jijingxu@jlu.edu.cn)

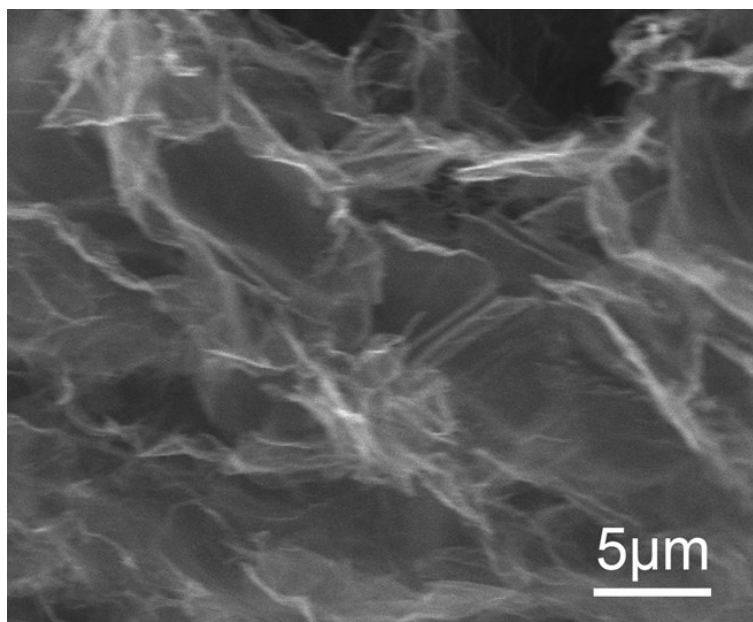

**Figure S1** SEM image of RGO. The RGO presents two-dimensional nanosheets morphology with micron long wrinkles.

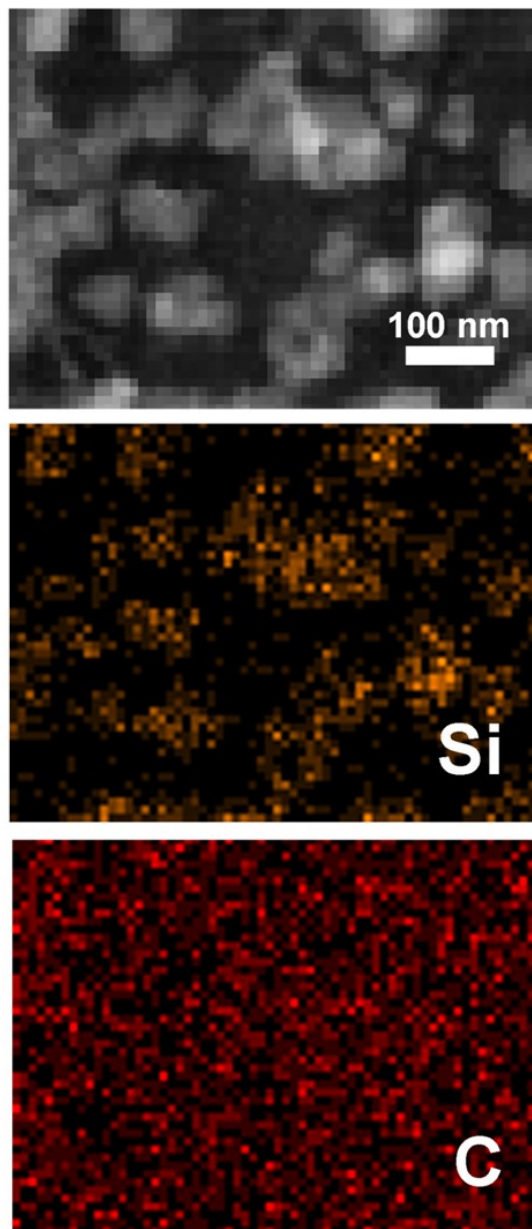

**Figure S2** Element mappings of SiC/RGO nanocomposite.

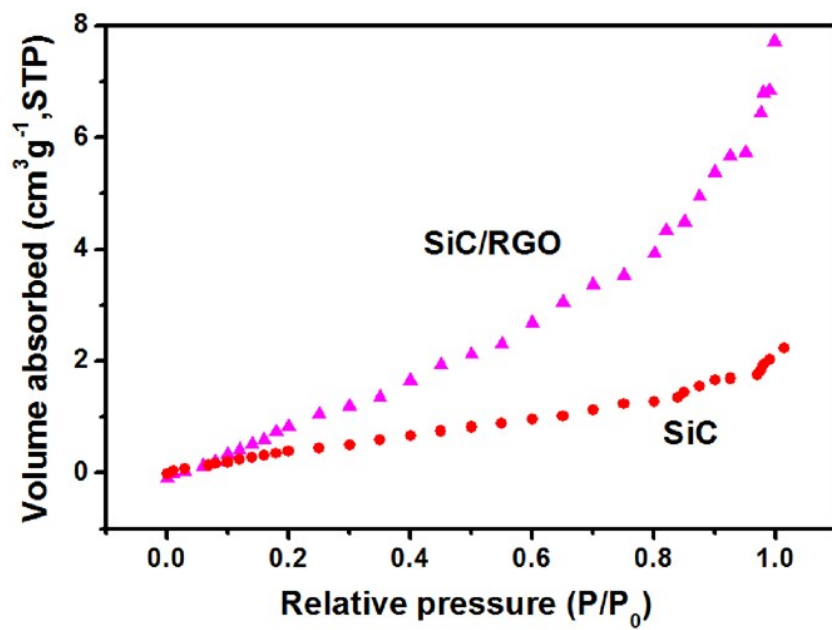

Figure S3 CO<sub>2</sub> adsorption isotherms of SiC/RGO and pure SiC samples.

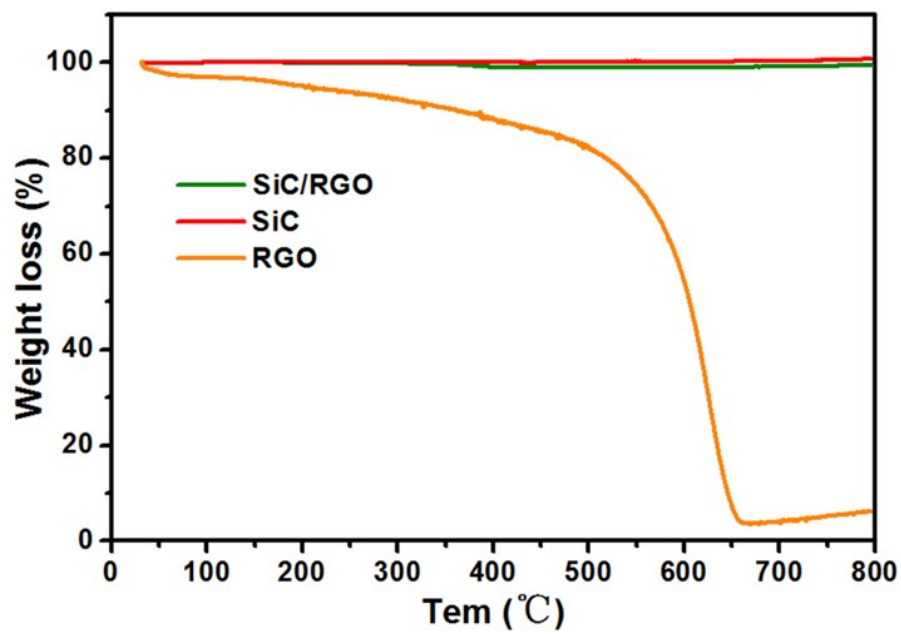

Figure S4 TG curves of SiC, SiC/RGO and RGO samples.

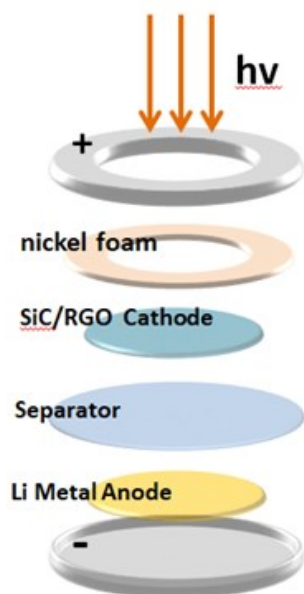

**Figure S5** Schematic configuration diagram of light-assisted Li-CO<sub>2</sub> battery.

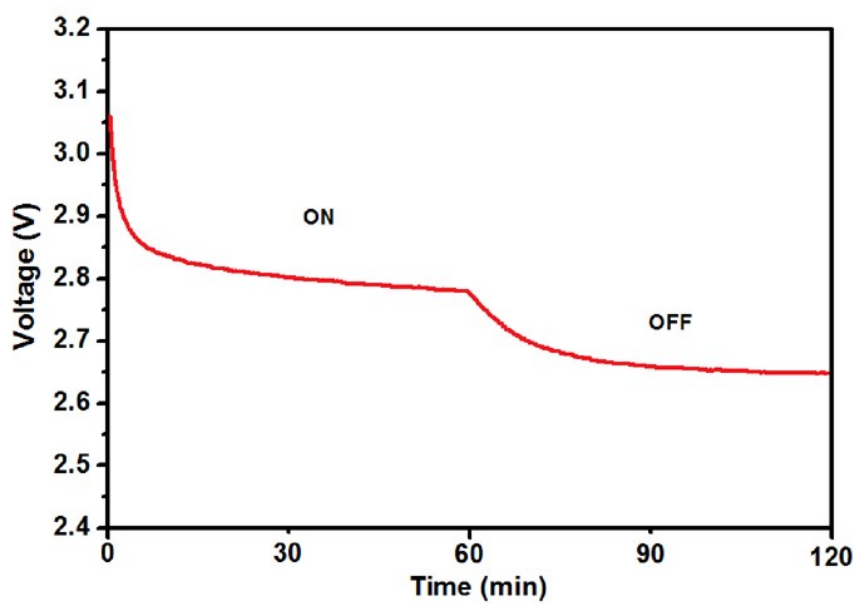

**Figure S6** Photo response of the discharge voltage in a photo-assisted Li-CO<sub>2</sub> battery with a current density of 20 mA g<sup>-1</sup> when illumination is switched from "on" to "off".

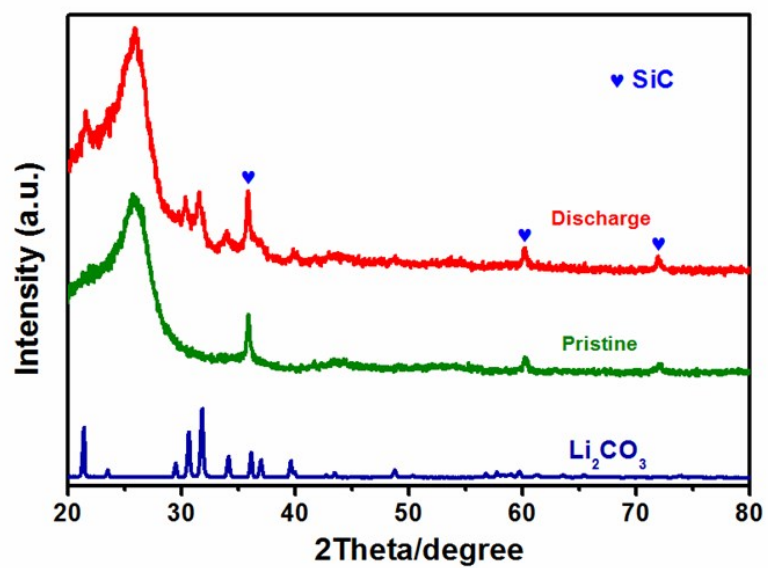

**Figure S7** XRD patterns of the cathodes after being discharged to the capacity of 1000 mA h g<sup>-1</sup> with a current density of 20 mA g<sup>-1</sup>.



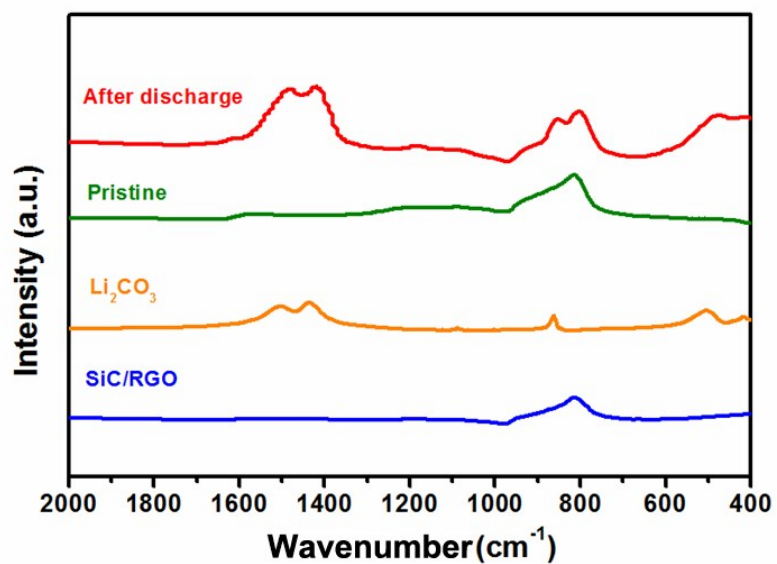

**Figure S8** FTIR spectra of the cathodes after being discharged to the capacity of 1000 mA h g<sup>-1</sup> with a current density of 20 mA g<sup>-1</sup>.

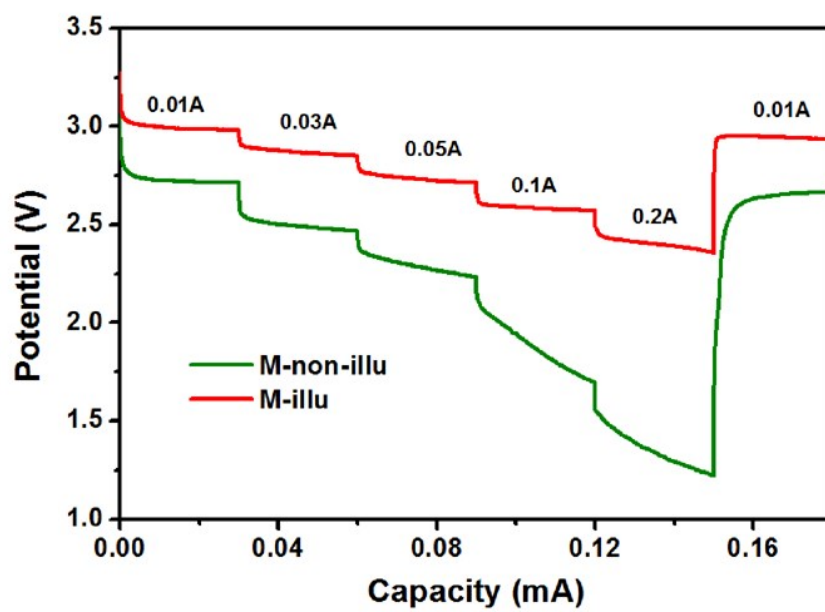

**Figure S9** Rate performance of the Li-CO<sub>2</sub> batteries using SiC/RGO cathodes with and without illumination.

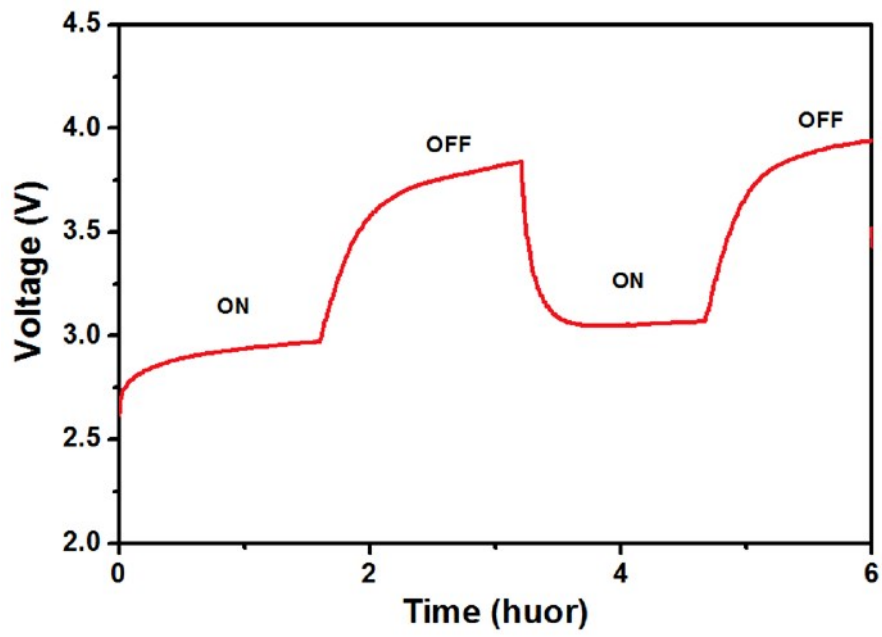

**Figure S10** Photo response of the charge voltage in a photo-assisted Li-CO<sub>2</sub> battery at a current density 20 mA g<sup>-1</sup> with the illumination switching between "on" and "off".

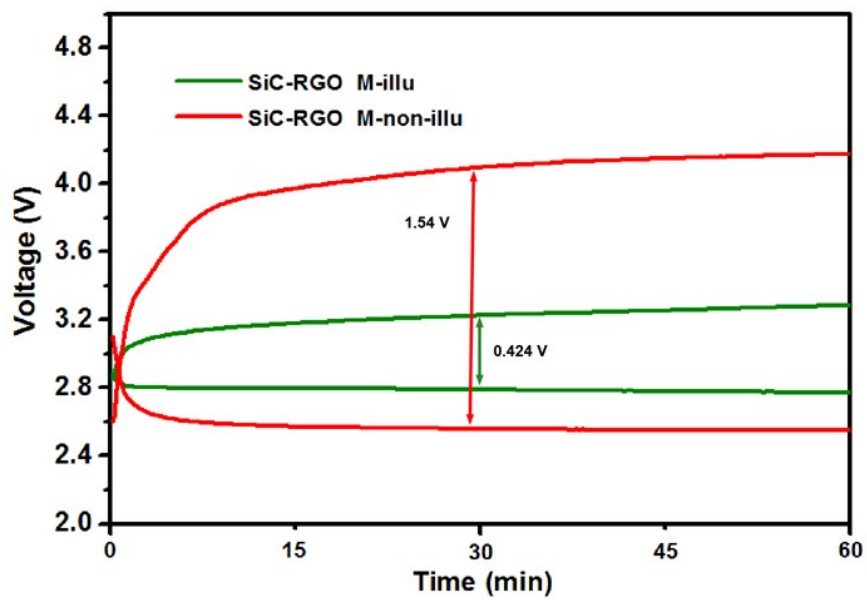

**Figure S11** The first charge and discharge curve at a current density of  $20 \text{ mA g}^{-1}$  with and without illumination.

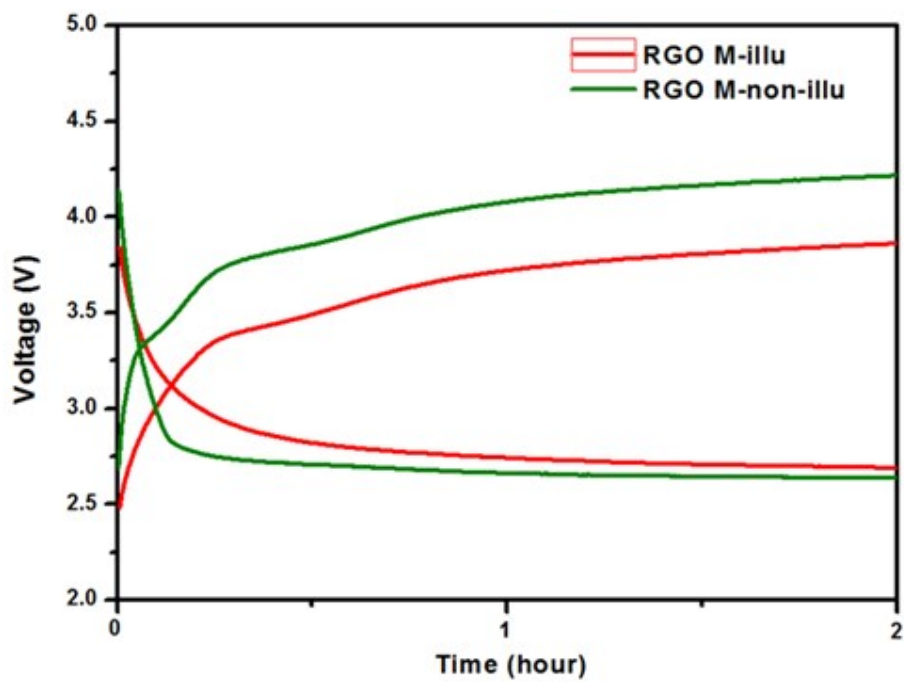

**Figure S12** Charge and discharge profiles of Li-CO<sub>2</sub> battery using RGO cathode with and without lighting.

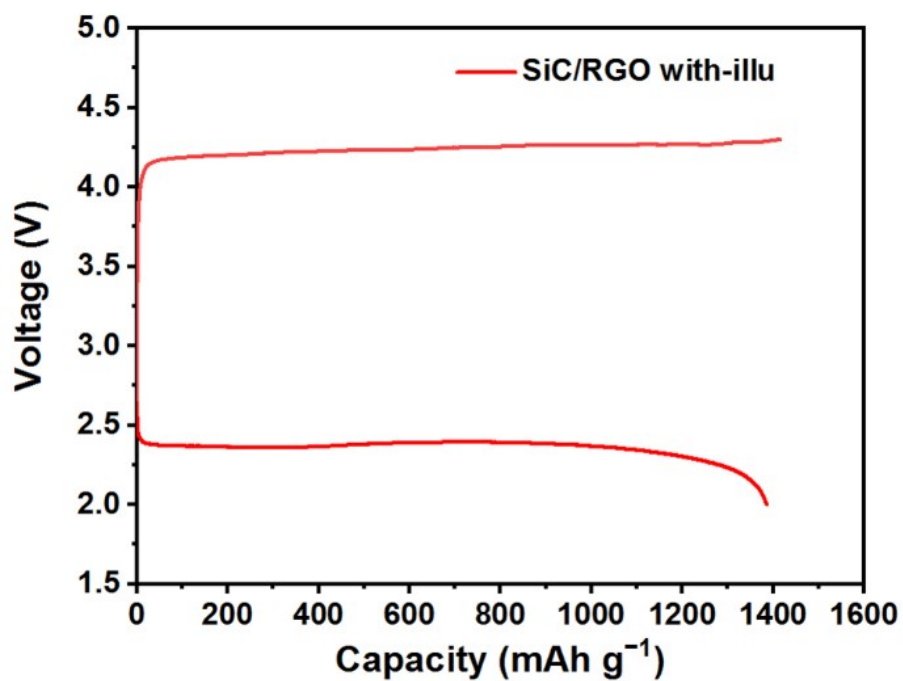

**Figure S13** Charge and discharge profiles of the Li-CO<sub>2</sub> battery at a current density of 50 mA g<sup>-1</sup> in the voltage range from 2.0 to 4.3 V with lighting.

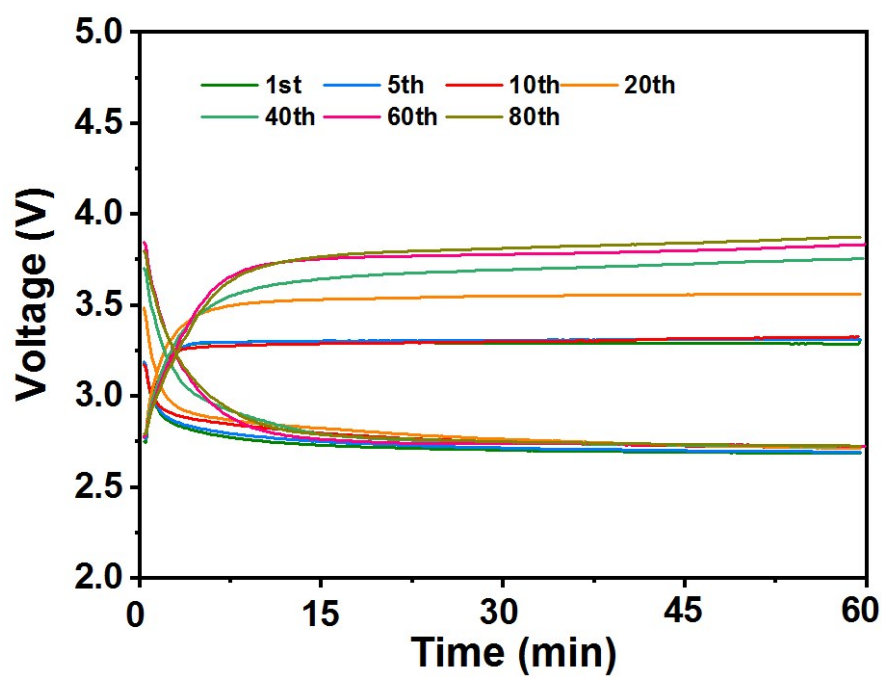

**Figure S14** Galvanostatic profiles of the photo-assisted Li-CO<sub>2</sub> battery using SiC/RGO cathode at a current density of 20 mA g<sup>-1</sup> with lighting.

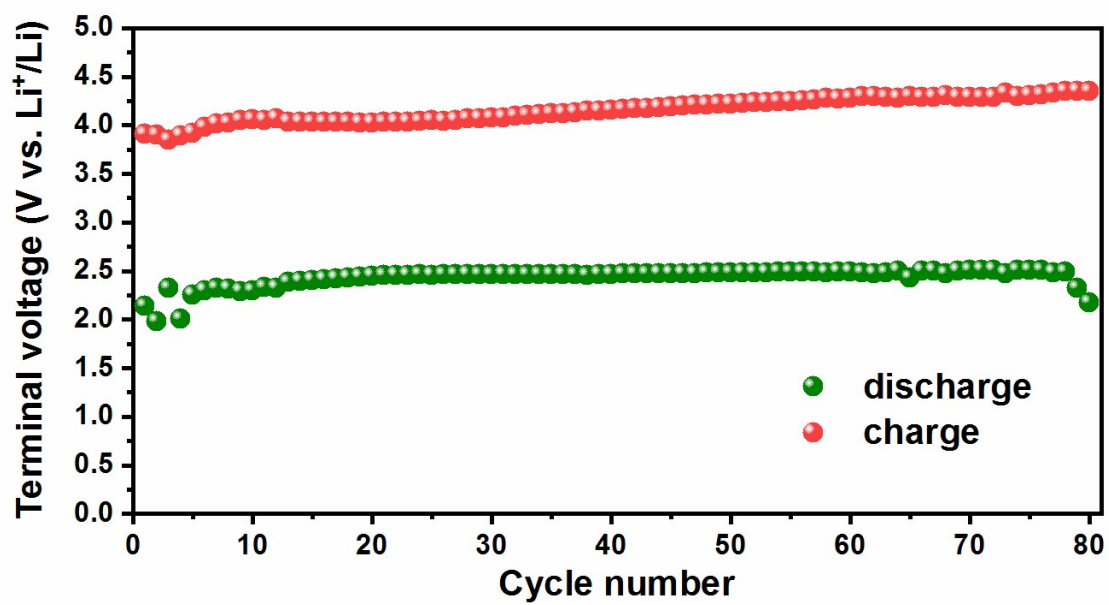

**Figure S15** Cyclic performance of the photo-assisted Li-CO<sub>2</sub> battery with SiC/RGO cathode at a current density of 100 mA g<sup>-1</sup>.



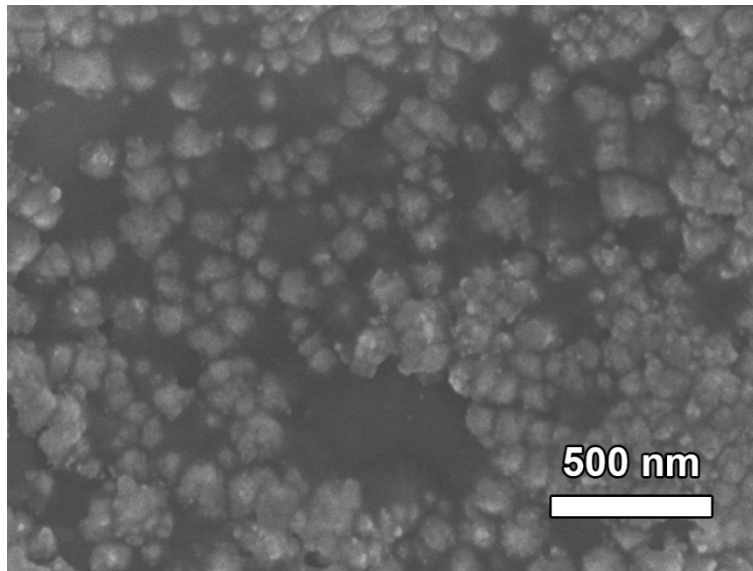

**Figure S16** SEM image of the SiC/RGO cathode after 20 cycles under illumination.

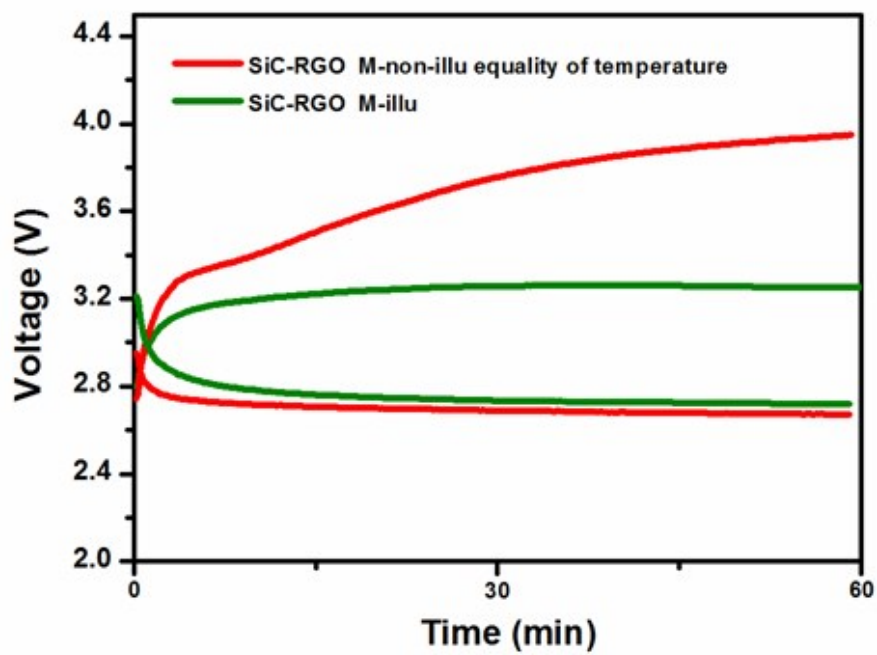

**Figure S17** Charge and discharge profiles of Li-CO<sub>2</sub> battery using SiC/RGO cathode with lighting and at the same temperature as the lighting.

**Table S1** The overpotential of Li-CO<sub>2</sub> batteries with different cathodes.

| <b>Cathodes</b>          | <b>Overpotential<br/>(V)</b> | <b>Energy efficiency<br/>(%)</b> | <b>Refs</b> |
|--------------------------|------------------------------|----------------------------------|-------------|
| CNTs                     | 1.65                         | -                                | 38          |
| Ru-Cu-G cathodes         | 0.88                         | -                                | 37          |
| CoPPc                    | 1.08                         | 74                               | 20          |
| CQD/hG-0.3               | 1.02                         | -                                | 17          |
| Ru@Super P               | -                            | 71                               | 18          |
| CC@Mo <sub>2</sub> C NPs | 0.65                         | 80                               | 19          |
| Ir NSs-CNFs              | 0.85                         | -                                | 10          |
| Mn <sub>2</sub> (dobdc)  | 1.30                         | 67                               | 23          |
| SiC/RGO                  | 0.42                         | 84                               | This work   |
